# Supplementary material for: Machine learning prediction of multiple distinct high-affinity chemotypes for α-synuclein fibrils
Source: Chem Commun (Camb). 2026 Jan 13;62(9):2922–6. doi: 10.1039/d5cc06228d (PMC12797025; doi:10.1039/d5cc06228d)
Supplement: CC-062-D5CC06228D-s002 [file CC-062-D5CC06228D-s002.xlsx]

## Sheet: Li_ChemComm_ESI_TableS12
Name	SMILES	Mcule ID	Pred.	Ki (nM)	Exp.	FP BV-21	FP TZ61-84	FP M503	Highest FP	Parent Label
P07-A	CC=1C=C(N2CC(O)CC2C=3C=CC(F)=CC3)N4N=CN=C4N1	MCULE-8208018033	0	NB	0	0.0733945	0.102564	0.117647	0.117647	M503-1619
P11-A	C1CCN(C2=NC=C(C3N=C(C4CN5C(=CN=C5)CC4)ON=3)C=C2)CC1	MCULE-4759842239	0	NB	0	0.0956522	0.0697674	0.126984	0.126984	M503-1619
P06-A	CCC1=CC=C(C=C1)NC(NC2=CNC3=CC=CC=C23)=O	MCULE-2241433376	0	NB	0	0.102041	0.100917	0.127273	0.127273	M503-1619
P10-A	C1(=NN=C(SCC(=O)NC2=CC=C3C(OCO3)=C2)N1C)C1C=COC=1C	MCULE-6909752187	0	NB	0	0.125	0.0952381	0.136	0.136	M503-1619
P17-A	ClC=1C=CN2N=C(NC(=O)NC=3C=NN(C3)C4CCCCC4)N=C2C1	MCULE-8621314498	0	NB	0	0.136364	0.104839	0.128	0.136364	BJ-1-94
P25-A	CC1=CC=C(C2NC(SCC(NC3=CC4=C(C=CN4C)C=C3)=O)=NN=2)C=C1	MCULE-6496962235	1	NB	0	0.127273	0.114754	0.138211	0.138211	M503-1619
P02-A	NC1=NC(C2=CC=C(N(C)C)C=C2)=CS1	MCULE-3640234203	0	NB	0	0.142857	0.0869565	0.106383	0.142857	BJ-1-94
P09-A	CC(CN(CC1)C(Nc(cc2)ccc2C(C)=O)=O)N1c1ccc(C)cc1	MCULE-8493756119	0	NB	0	0.134021	0.0892857	0.145455	0.145455	M503-1619
P16-A	CC(C)N1C=C(NC(=O)NC=2C=CC3=C(OCC3(C)C)C2)C=N1	MCULE-9820771788	0	NB	0	0.147059	0.112069	0.136752	0.147059	BJ-1-94
P15-A	CC(C)C1=NC=2C=C(NC(=O)NC=3C=C(C=CN3)C(=O)N(C)C)C=CC2O1	MCULE-8008821641	0	NB	0	0.148148	0.123967	0.138211	0.148148	BJ-1-94
P26-A	CC(C1OC(C2=CC=CC=C2)=CN=1)NC(C(NC1=CC2=C(N=C(O2)C)C=C1)=O)=O	MCULE-5206636263	0	NB	0	0.142857	0.147541	0.170732	0.170732	M503-1619
P13-A	CC(C)NC=1C=CC(=CN1)C(=O)NC2=NN=C(S2)C=3C=CN=CC3	MCULE-5266123310	1	104	0	0.178947	0.117117	0.153153	0.178947	BJ-1-94
P14-A	O=C(NC1=NN=C(S1)C=2C=CN=CC2)C=3C=CC(SC4CC4)=CC3	MCULE-6206705061	0	61.74	0	0.1875	0.0769231	0.111111	0.1875	BJ-1-94
P22-A	CCN(CC)C=1C=CC(=CC1)C(=O)NC2=NN=C(S2)C=3C=CN=CC3	MCULE-9236698514	1	4.605	1	0.191489	0.0973451	0.113043	0.191489	BJ-1-94
P29-A	CC1=NNC(=N1)C=2C=CC(NC(=O)C3=CC=4C=NC=CC4O3)=CC2	MCULE-2019341366	1	9.414	1	0.195876	0.122807	0.189189	0.195876	BJ-1-94
P12-A	[O-][N+](=O)C=1C=CC(=CC1)C(=O)NC2=NN=C(S2)C=3C=CN=CC3	MCULE-7388529879	0	617	0	0.197802	0.0707965	0.0964912	0.197802	BJ-1-94
P19-V	O=C(C1=CC=C(C)C(C)=C1)NC(S2)=NN=C2C3=CC=NC=C3	MCULE-4854937769	0	12.7	1	0.202247	0.0917431	0.108108	0.202247	BJ-1-94
P23-V	CCOc(cc1)ccc1C(Nc1nnc(-c2ccncc2)s1)=O	MCULE-1488042594	1	10.36	1	0.244444	0.127273	0.163636	0.244444	BJ-1-94
P24-M	COC1=CC=C(N=C(N2CCN(C3=NC=CC=N3)CC2)S4)C4=C1	MCULE-1195918550	1	30.524	0	0.157895	0.140187	0.272727	0.272727	M503-1619
P08-M	Cc1nc(N(CC2)CCN2c2ncccc2)nc(CCC2)c1C2=O	MCULE-5461172863	1	NB	0	0.0747664	0.0672269	0.323232	0.323232	M503-1619
P18-Z	CN(C)C1=CC2=CC=CC=C2N=C1NC3=CN=C(OC)C=C3	TZ80-142	0	NB	0	0.112245	0.32967	0.157407	0.32967	TZ61-84
P04-V	O=C(NC1=NN=C(C2=CC=NC=C2)S1)C3=CC=C(OC)C=C3	MCULE-4152335408	1	47.9	0	0.35	0.142857	0.192308	0.35	BJ-1-94
P05-Z	CN(C)C(C=C1)=CC2=C1N=C(S2)NC3=CN=C(OC)C=C3	TZ80-84	0	257.6	0	0.121212	0.351648	0.154545	0.351648	TZ61-84
P01-V	NC1=CC(C2=CC=C(OC)C=C2)=NO1	MCULE-5879131729	0	NB	0	0.375	0.136364	0.168539	0.375	BJ-1-94
P30-Z	COC1=CC=C(N=C(NC2=CC=C(OC)C=C2)C=C3)C3=C1	TZ90-8	1	22.12	1	0.180723	0.447368	0.2	0.447368	TZ61-84
P28-V	BrC1=CC=C(C2=NOC(NC(C3=CC=CC(OCC)=C3)=O)=C2)C=C1	MCULE-1131491708	1	9.87	1	0.45679	0.140351	0.165217	0.45679	BJ-1-94
P20-V	CC1=CC=C(C2=NOC(NC(C3=CC=C(OCCC)C=C3)=O)=C2)C=C1	MCULE-6705203185	1	4.25	1	0.583333	0.145455	0.140351	0.583333	BJ-1-94
P27-M	O=C(C1=CN=C(N=C1)N2CCN(CC2)C3=NC=CC=C3)NC4=CC=C(OC)C=C4	MCULE-1682064949	1	6.77	1	0.226804	0.159292	0.646341	0.646341	M503-1619
P03-M	O=C(C(C=NC(N1CCN(CC1)C2=CC=C(OC)C=C2)=N3)=C3N)NC4=CC=C(OC)C=C4	MCULE-2502940094	1	44.78	0	0.221053	0.185185	0.692308	0.692308	M503-1619
P21-V	BrC1=CC=C(C2=NOC(NC(C3=CC=C(OC)C=C3)=O)=C2)C=C1	MCULE-5698809192	0	16.62	1	0.783333	0.15534	0.194175	0.783333	BJ-1-94
